# Supplementary material
Source: publisher figshare collection journal article supplement (https://acs.figshare.com/ndownloader/files/5121679)
Supplement: Supplementary file 1 [file 5121679]

## Supporting Information

### N-Methylpyrrole-terminated Polyisobutylene Through End-quenching of Quasiliving Carbocationic Polymerization

Robson F. Storey, Casey D. Stokes, and James J. Harrison

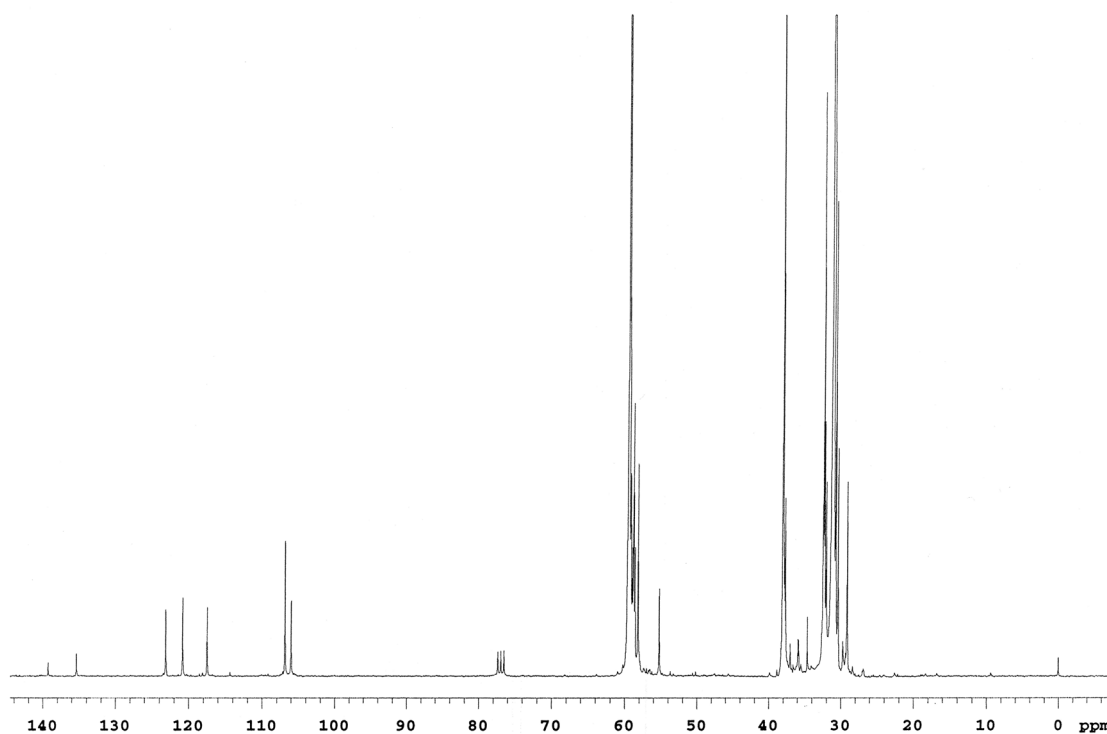

Figure 1.  $^{13}\text{C}$  NMR spectrum of 2- and 3-PIB-N-methylpyrrole.

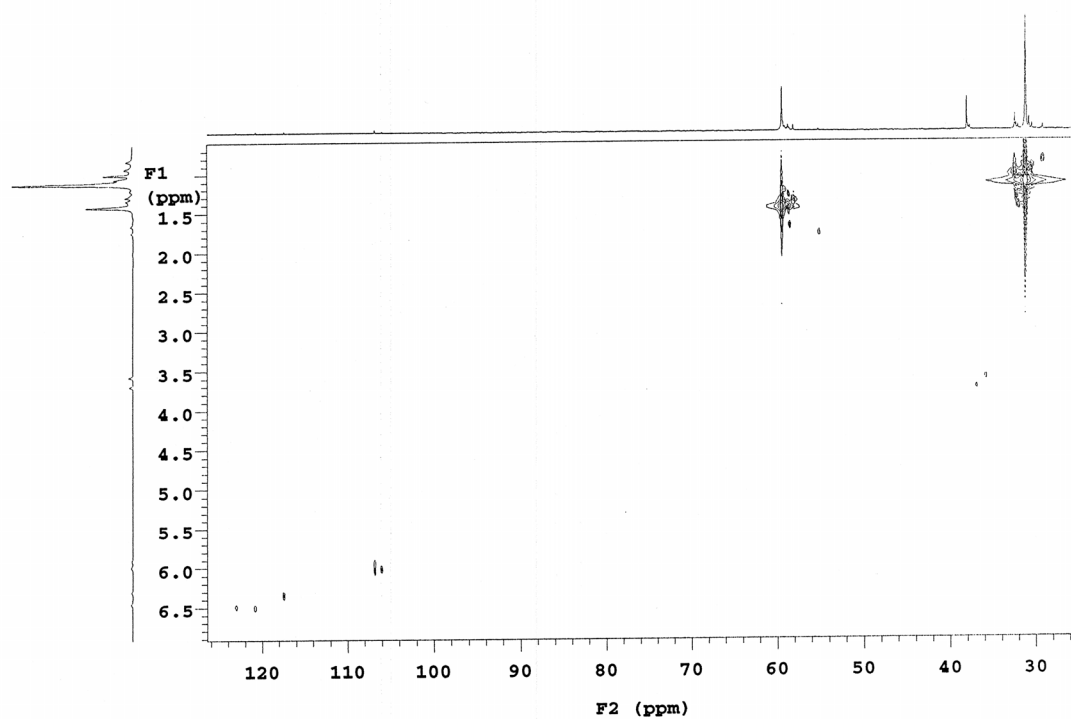

Figure 2.  $^1\text{H}$ - $^{13}\text{C}$  heteronuclear correlation (HETCOR) NMR spectrum of 2- and 3-PIB-N-methylpyrrole.

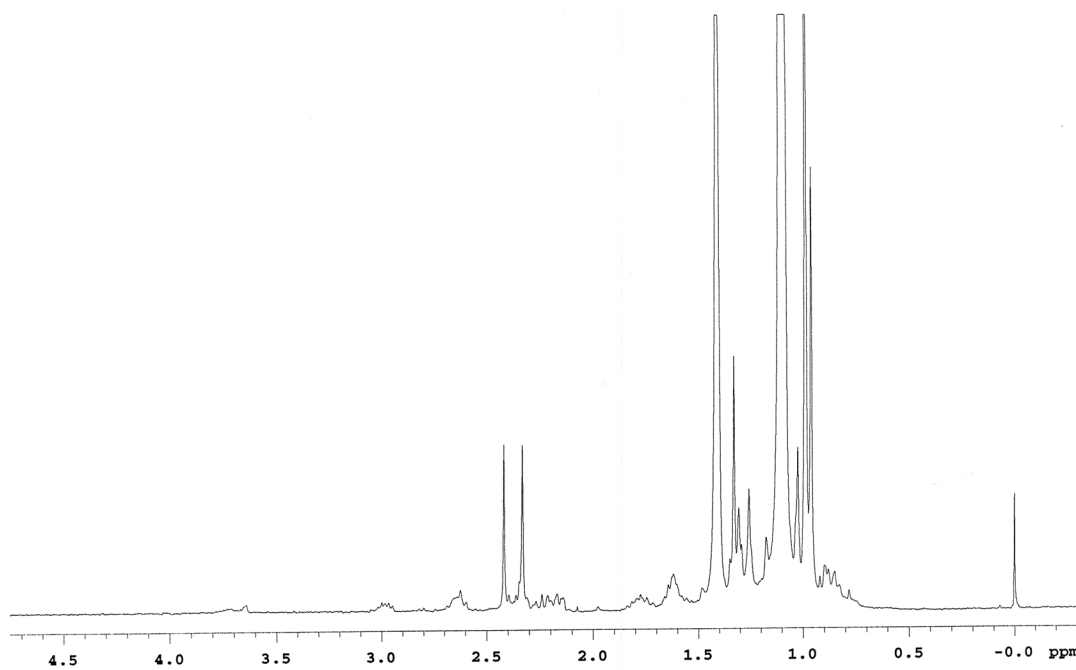

Figure 3.  $^1\text{H}$  NMR spectrum of 2- and 3-PIB-N-methylpyrrolidine.

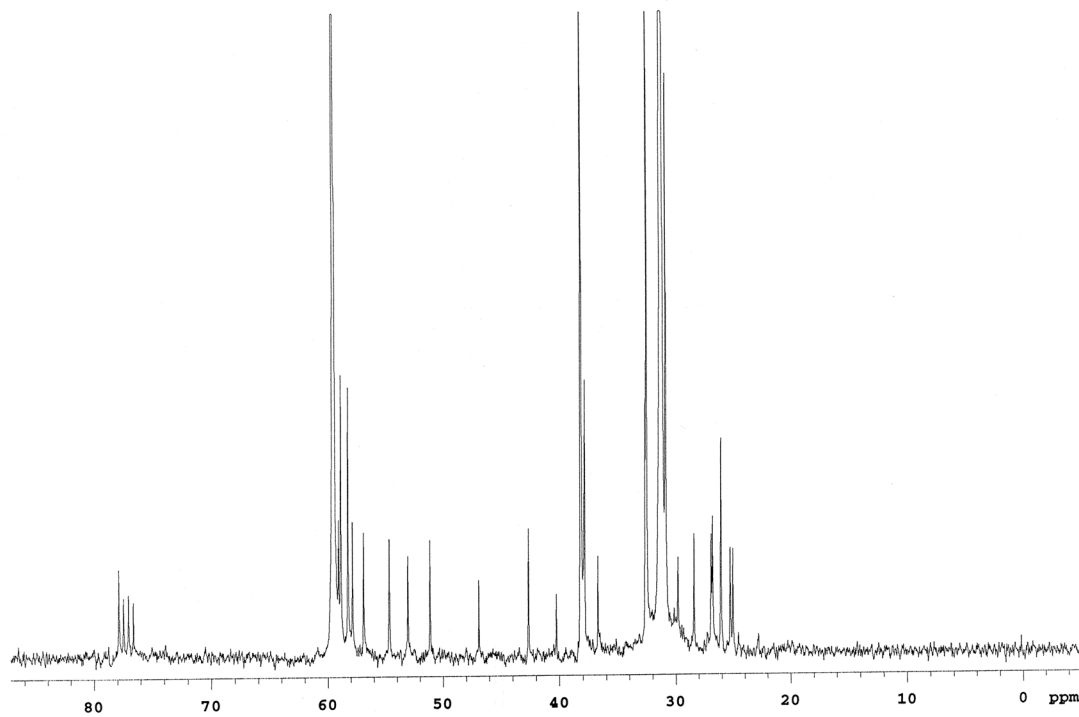

Figure 4.  $^{13}\text{C}$  NMR spectrum of 2- and 3-PIB-N-methylpyrrolidine.

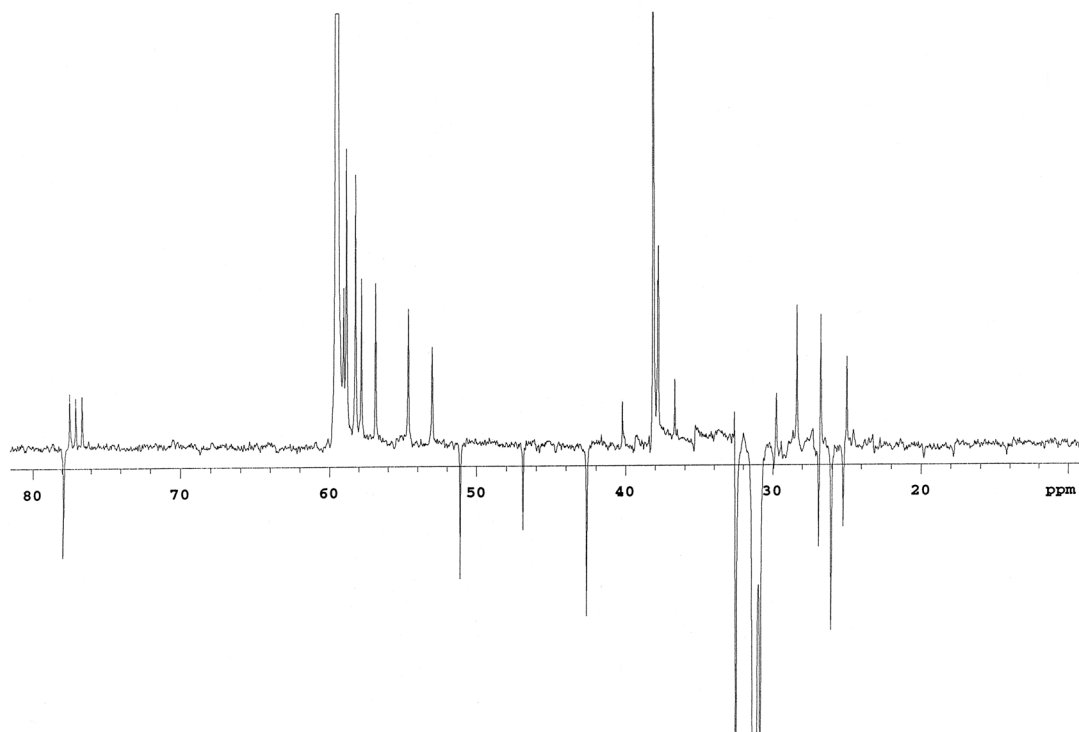

Figure 5. APT NMR spectrum of 2- and 3-PIB-N-methylpyrrolidine.

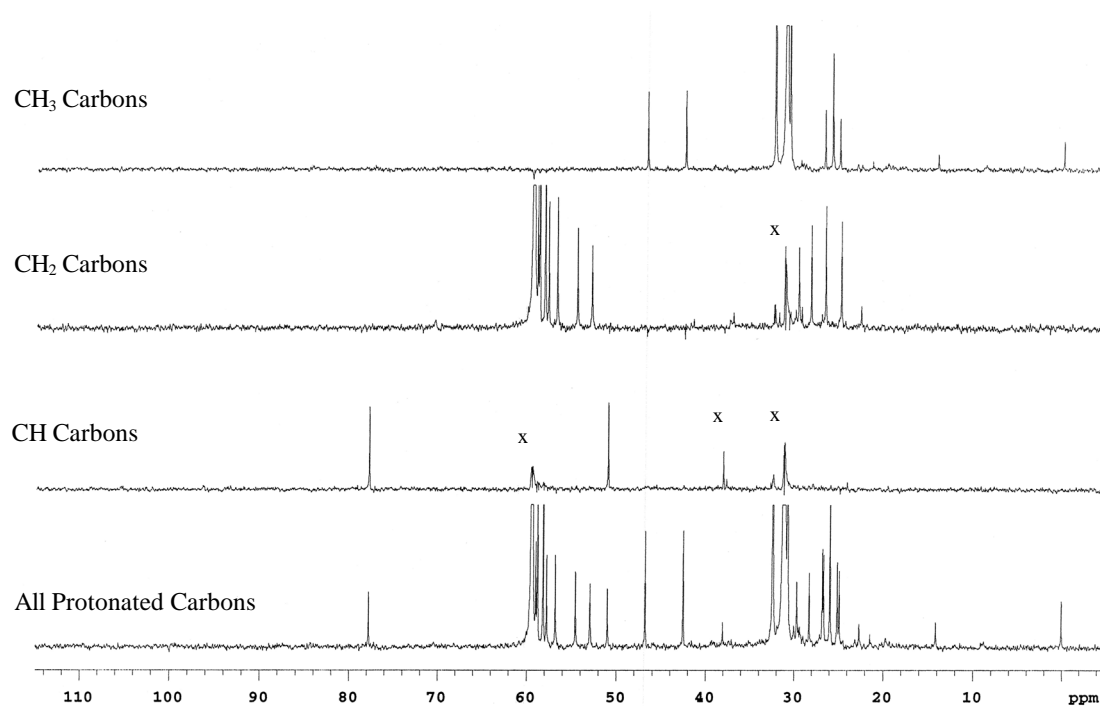

Figure 6. DEPT NMR spectrum of 2- and 3-PIB-N-methylpyrrolidine (x denotes spurious peaks resulting from poor subtraction of the edited spectra).

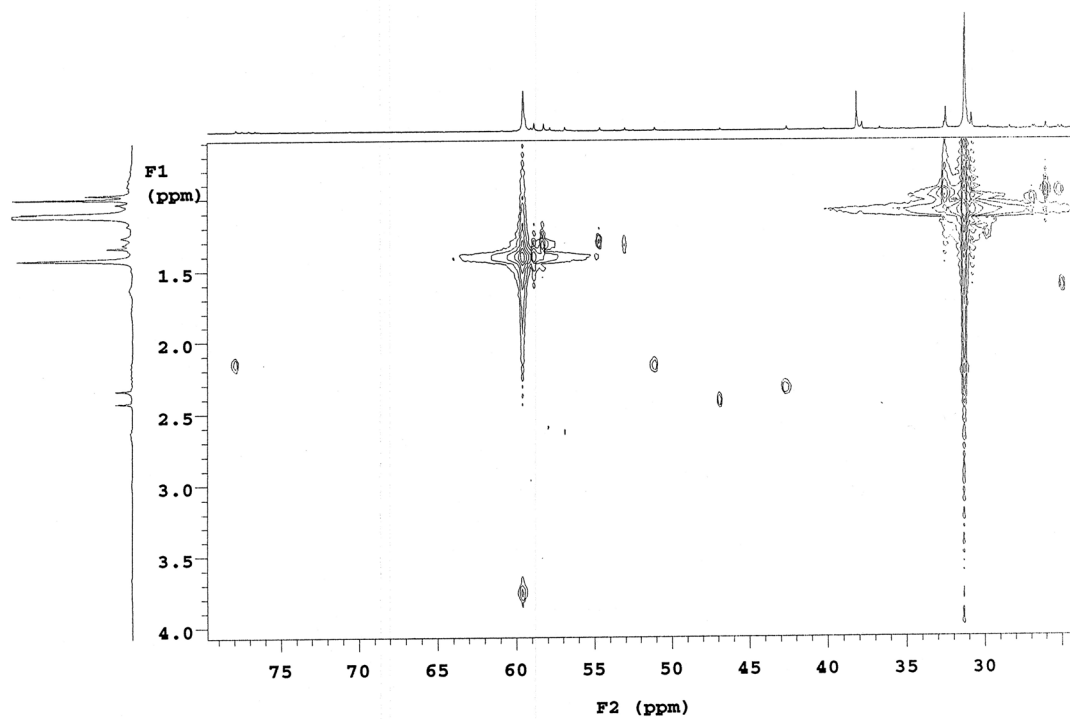

Figure 7. <sup>1</sup>H-<sup>13</sup>C heteronuclear correlation (HETCOR) NMR spectrum of 2- and 3-PIB-N-methylpyrrolidine.

**Table 1. Partial Chemical Shift Assignment for 2- and 3-PIB-N-methylpyrrolidine**

| <b><math>^{13}\text{C}</math> Chemical Shift (ppm)</b> | <b>Assignment</b>   | <b><math>^1\text{H}</math> Chemical Shift (ppm)</b> |
|--------------------------------------------------------|---------------------|-----------------------------------------------------|
| 77.78                                                  | CH                  | 2.17, m                                             |
| 59.45                                                  | PIB-CH <sub>2</sub> | 1.41, s                                             |
| 58.77                                                  | CH <sub>2</sub>     |                                                     |
| 58.14                                                  | CH <sub>2</sub>     |                                                     |
| 57.74                                                  | CH <sub>2</sub>     |                                                     |
| 56.78                                                  | CH <sub>2</sub>     |                                                     |
| 54.54                                                  | CH <sub>2</sub>     |                                                     |
| 52.92                                                  | CH <sub>2</sub>     |                                                     |
| 51.00                                                  | CH                  | 2.17, m                                             |
| 46.78                                                  | N-CH <sub>3</sub>   | 2.42, s                                             |
| 42.51                                                  | N-CH <sub>3</sub>   | 2.33, s                                             |
| 40.13                                                  | C                   |                                                     |
| 38.07                                                  | PIB-C               |                                                     |
| 36.59                                                  | C                   |                                                     |
| 32.51                                                  | C                   |                                                     |
| 32.40                                                  | CH <sub>3</sub>     |                                                     |
| 31.18                                                  | PIB-CH <sub>3</sub> | 1.11, s                                             |
| 29.66                                                  | CH <sub>2</sub>     |                                                     |
| 28.27                                                  | CH <sub>2</sub>     |                                                     |
| 26.78                                                  | CH <sub>3</sub>     |                                                     |
| 26.66                                                  | CH <sub>2</sub>     |                                                     |
| 25.94                                                  | CH <sub>3</sub>     |                                                     |
| 25.12                                                  | CH <sub>3</sub>     |                                                     |
| 24.89                                                  | CH <sub>2</sub>     |                                                     |
